# Supplementary material
Source: publisher figshare collection journal article supplement (https://acs.figshare.com/ndownloader/files/4661011)
Supplement: Supplementary file 1 [file 4661011]

data_x1592l
 
_audit_creation_method            SHELXL-97
_chemical_name_systematic
;
 ?
;
_chemical_name_common             ?
_chemical_melting_point           ?
_chemical_formula_moiety          ?
_chemical_formula_sum
 'C49 H37 Cl3 Hf N4 O2'
_chemical_formula_weight          998.67
 
loop_
 _atom_type_symbol
 _atom_type_description
 _atom_type_scat_dispersion_real
 _atom_type_scat_dispersion_imag
 _atom_type_scat_source
 'C'  'C'   0.0033   0.0016
 'International Tables Vol C Tables 4.2.6.8 and 6.1.1.4'
 'H'  'H'   0.0000   0.0000
 'International Tables Vol C Tables 4.2.6.8 and 6.1.1.4'
 'N'  'N'   0.0061   0.0033
 'International Tables Vol C Tables 4.2.6.8 and 6.1.1.4'
 'O'  'O'   0.0106   0.0060
 'International Tables Vol C Tables 4.2.6.8 and 6.1.1.4'
 'Hf'  'Hf'  -0.5830   6.1852
 'International Tables Vol C Tables 4.2.6.8 and 6.1.1.4'
 'Cl'  'Cl'   0.1484   0.1585
 'International Tables Vol C Tables 4.2.6.8 and 6.1.1.4'
 
_symmetry_cell_setting            Monoclinic
_symmetry_space_group_name_H-M    P2(1)/c
 
loop_
 _symmetry_equiv_pos_as_xyz
 'x, y, z'
 '-x, y+1/2, -z+1/2'
 '-x, -y, -z'
 'x, -y-1/2, z-1/2'
 
_cell_length_a                    14.192(3)
_cell_length_b                    19.046(4)
_cell_length_c                    15.641(3)
_cell_angle_alpha                 90.00
_cell_angle_beta                  94.27(3)
_cell_angle_gamma                 90.00
_cell_volume                      4216.1(14)
_cell_formula_units_Z             4
_cell_measurement_temperature     100(2)
_cell_measurement_reflns_used     ?
_cell_measurement_theta_min       ?
_cell_measurement_theta_max       ?
 
_exptl_crystal_description        ?
_exptl_crystal_colour             ?
_exptl_crystal_size_max           0.18
_exptl_crystal_size_mid           0.18
_exptl_crystal_size_min           0.02
_exptl_crystal_density_meas       ?
_exptl_crystal_density_diffrn     1.573
_exptl_crystal_density_method     'not measured'
_exptl_crystal_F_000              1992
_exptl_absorpt_coefficient_mu     2.710
_exptl_absorpt_correction_type    integration
_exptl_absorpt_correction_T_min   0.6412
_exptl_absorpt_correction_T_max   0.9579
_exptl_absorpt_process_details    numerical
 
_exptl_special_details
;
 ?
;
 
_diffrn_ambient_temperature       100(2)
_diffrn_radiation_wavelength      0.71073
_diffrn_radiation_type            MoK\a
_diffrn_radiation_source          'fine-focus sealed tube'
_diffrn_radiation_monochromator   graphite
_diffrn_measurement_device_type   'Bruker-Nonius KappaCCD'
_diffrn_measurement_method        '\w scans'
_diffrn_detector_area_resol_mean  ?
_diffrn_standards_number          ?
_diffrn_standards_interval_count  ?
_diffrn_standards_interval_time   ?
_diffrn_standards_decay_%         ?
_diffrn_reflns_number             37708
_diffrn_reflns_av_R_equivalents   0.1281
_diffrn_reflns_av_sigmaI/netI     0.1388
_diffrn_reflns_limit_h_min        -18
_diffrn_reflns_limit_h_max        13
_diffrn_reflns_limit_k_min        -24
_diffrn_reflns_limit_k_max        23
_diffrn_reflns_limit_l_min        -19
_diffrn_reflns_limit_l_max        20
_diffrn_reflns_theta_min          1.79
_diffrn_reflns_theta_max          27.48
_reflns_number_total              9630
_reflns_number_gt                 6049
_reflns_threshold_expression      >2sigma(I)
 
_computing_data_collection        'Bruker XSCANS'
_computing_cell_refinement        'Bruker XSCANS'
_computing_data_reduction         'Bruker SHELXTL'
_computing_structure_solution     'SHELXS-97 (Sheldrick, 1990)'
_computing_structure_refinement   'SHELXL-97 (Sheldrick, 1997)'
_computing_molecular_graphics     'Bruker SHELXTL'
_computing_publication_material   'Bruker SHELXTL'
 
_refine_special_details
;
 Refinement of F^2^ against ALL reflections.  The weighted R-factor wR and
 goodness of fit S are based on F^2^, conventional R-factors R are based
 on F, with F set to zero for negative F^2^. The threshold expression of
 F^2^ > 2sigma(F^2^) is used only for calculating R-factors(gt) etc. and is
 not relevant to the choice of reflections for refinement.  R-factors based
 on F^2^ are statistically about twice as large as those based on F, and R-
 factors based on ALL data will be even larger.
;
 
_refine_ls_structure_factor_coef  Fsqd
_refine_ls_matrix_type            full
_refine_ls_weighting_scheme       calc
_refine_ls_weighting_details
 'calc w=1/[\s^2^(Fo^2^)+(0.0243P)^2^+11.3523P] where P=(Fo^2^+2Fc^2^)/3'
_atom_sites_solution_primary      direct
_atom_sites_solution_secondary    difmap
_atom_sites_solution_hydrogens    geom
_refine_ls_hydrogen_treatment     constr
_refine_ls_extinction_method      none
_refine_ls_extinction_coef        ?
_refine_ls_number_reflns          9630
_refine_ls_number_parameters      536
_refine_ls_number_restraints      0
_refine_ls_R_factor_all           0.1231
_refine_ls_R_factor_gt            0.0586
_refine_ls_wR_factor_ref          0.1046
_refine_ls_wR_factor_gt           0.0879
_refine_ls_goodness_of_fit_ref    1.017
_refine_ls_restrained_S_all       1.017
_refine_ls_shift/su_max           0.001
_refine_ls_shift/su_mean          0.000
 
loop_
 _atom_site_label
 _atom_site_type_symbol
 _atom_site_fract_x
 _atom_site_fract_y
 _atom_site_fract_z
 _atom_site_U_iso_or_equiv
 _atom_site_adp_type
 _atom_site_occupancy
 _atom_site_symmetry_multiplicity
 _atom_site_calc_flag
 _atom_site_refinement_flags
 _atom_site_disorder_assembly
 _atom_site_disorder_group
Hf Hf 0.472943(19) 0.423169(13) 0.474002(16) 0.01506(8) Uani 1 1 d . . .
N1 N 0.3939(4) 0.4108(2) 0.3460(3) 0.0174(12) Uani 1 1 d . . .
N2 N 0.5783(4) 0.3606(3) 0.4047(3) 0.0167(12) Uani 1 1 d . . .
N3 N 0.5210(4) 0.3458(3) 0.5740(3) 0.0181(12) Uani 1 1 d . . .
N4 N 0.3318(4) 0.3844(3) 0.5123(3) 0.0160(12) Uani 1 1 d . . .
C1 C 0.2984(4) 0.4267(3) 0.3275(4) 0.0209(14) Uani 1 1 d . . .
C2 C 0.2805(5) 0.4369(3) 0.2372(4) 0.0267(17) Uani 1 1 d . . .
H2A H 0.2215 0.4487 0.2081 0.032 Uiso 1 1 calc R . .
C3 C 0.3624(5) 0.4266(4) 0.2008(4) 0.0239(15) Uani 1 1 d . . .
H3A H 0.3716 0.4306 0.1415 0.029 Uiso 1 1 calc R . .
C4 C 0.4333(5) 0.4086(3) 0.2673(4) 0.0204(15) Uani 1 1 d . . .
C5 C 0.5261(5) 0.3892(3) 0.2539(4) 0.0187(15) Uani 1 1 d . . .
C6 C 0.5915(5) 0.3653(3) 0.3178(4) 0.0176(14) Uani 1 1 d . . .
C7 C 0.6836(5) 0.3397(3) 0.3023(4) 0.0203(15) Uani 1 1 d . . .
H7A H 0.7098 0.3371 0.2482 0.024 Uiso 1 1 calc R . .
C8 C 0.7265(5) 0.3201(3) 0.3783(4) 0.0226(16) Uani 1 1 d . . .
H8A H 0.7883 0.3009 0.3874 0.027 Uiso 1 1 calc R . .
C9 C 0.6622(5) 0.3333(3) 0.4427(4) 0.0189(15) Uani 1 1 d . . .
C10 C 0.6809(4) 0.3202(3) 0.5304(4) 0.0178(14) Uani 1 1 d . . .
C11 C 0.6149(4) 0.3259(3) 0.5912(4) 0.0175(14) Uani 1 1 d . . .
C12 C 0.6294(5) 0.3069(3) 0.6800(4) 0.0205(15) Uani 1 1 d . . .
H12A H 0.6877 0.2932 0.7090 0.025 Uiso 1 1 calc R . .
C13 C 0.5465(5) 0.3120(3) 0.7147(4) 0.0228(16) Uani 1 1 d . . .
H13A H 0.5352 0.3012 0.7724 0.027 Uiso 1 1 calc R . .
C14 C 0.4783(4) 0.3361(3) 0.6506(4) 0.0154(14) Uani 1 1 d . . .
C15 C 0.3825(5) 0.3451(3) 0.6592(4) 0.0177(14) Uani 1 1 d . . .
C16 C 0.3152(4) 0.3675(3) 0.5968(4) 0.0190(15) Uani 1 1 d . . .
C17 C 0.2172(5) 0.3794(3) 0.6082(4) 0.0219(15) Uani 1 1 d . . .
H17A H 0.1871 0.3717 0.6596 0.026 Uiso 1 1 calc R . .
C18 C 0.1752(5) 0.4033(3) 0.5341(4) 0.0244(16) Uani 1 1 d . . .
H18A H 0.1106 0.4160 0.5237 0.029 Uiso 1 1 calc R . .
C19 C 0.2468(4) 0.4058(3) 0.4735(4) 0.0201(15) Uani 1 1 d . . .
C20 C 0.2291(4) 0.4257(3) 0.3873(4) 0.0185(14) Uani 1 1 d . . .
C21 C 0.5551(5) 0.3909(3) 0.1641(4) 0.0199(15) Uani 1 1 d . . .
C22 C 0.5182(5) 0.3434(3) 0.1028(4) 0.0234(16) Uani 1 1 d . . .
H22A H 0.4719 0.3104 0.1175 0.028 Uiso 1 1 calc R . .
C23 C 0.5485(5) 0.3440(3) 0.0200(4) 0.0245(16) Uani 1 1 d . . .
H23A H 0.5234 0.3106 -0.0207 0.029 Uiso 1 1 calc R . .
C24 C 0.6146(5) 0.3924(4) -0.0045(4) 0.0244(16) Uani 1 1 d . . .
C25 C 0.6522(5) 0.4391(3) 0.0572(4) 0.0244(16) Uani 1 1 d . . .
H25A H 0.6983 0.4721 0.0423 0.029 Uiso 1 1 calc R . .
C26 C 0.6238(5) 0.4383(3) 0.1403(4) 0.0236(16) Uani 1 1 d . . .
H26A H 0.6514 0.4704 0.1815 0.028 Uiso 1 1 calc R . .
C27 C 0.6463(5) 0.3922(4) -0.0941(4) 0.0340(18) Uani 1 1 d . . .
H27A H 0.5954 0.4102 -0.1339 0.051 Uiso 1 1 calc R . .
H27B H 0.6621 0.3442 -0.1103 0.051 Uiso 1 1 calc R . .
H27C H 0.7022 0.4222 -0.0964 0.051 Uiso 1 1 calc R . .
C31 C 0.7763(4) 0.2930(3) 0.5591(4) 0.0178(14) Uani 1 1 d . . .
C32 C 0.7895(5) 0.2254(3) 0.5920(4) 0.0206(15) Uani 1 1 d . . .
H32A H 0.7361 0.1957 0.5956 0.025 Uiso 1 1 calc R . .
C34 C 0.9578(5) 0.2413(4) 0.6154(4) 0.0264(17) Uani 1 1 d . . .
C35 C 0.9472(5) 0.3083(4) 0.5816(4) 0.0307(18) Uani 1 1 d . . .
H35A H 1.0012 0.3372 0.5774 0.037 Uiso 1 1 calc R . .
C33 C 0.8784(5) 0.2000(3) 0.6198(4) 0.0235(16) Uani 1 1 d . . .
H33A H 0.8846 0.1537 0.6421 0.028 Uiso 1 1 calc R . .
C36 C 0.8577(5) 0.3341(3) 0.5534(4) 0.0240(16) Uani 1 1 d . . .
H36A H 0.8521 0.3800 0.5300 0.029 Uiso 1 1 calc R . .
C37 C 1.0538(5) 0.2156(4) 0.6479(5) 0.040(2) Uani 1 1 d . . .
H37A H 1.0653 0.2278 0.7087 0.060 Uiso 1 1 calc R . .
H37B H 1.1019 0.2377 0.6151 0.060 Uiso 1 1 calc R . .
H37C H 1.0568 0.1645 0.6412 0.060 Uiso 1 1 calc R . .
C41 C 0.3496(4) 0.3325(3) 0.7471(4) 0.0178(15) Uani 1 1 d . . .
C42 C 0.3010(5) 0.2731(3) 0.7669(4) 0.0267(17) Uani 1 1 d . . .
H42A H 0.2862 0.2389 0.7237 0.032 Uiso 1 1 calc R . .
C43 C 0.2732(5) 0.2623(4) 0.8486(4) 0.0307(18) Uani 1 1 d . . .
H43A H 0.2377 0.2215 0.8597 0.037 Uiso 1 1 calc R . .
C44 C 0.2955(5) 0.3093(3) 0.9150(4) 0.0227(16) Uani 1 1 d . . .
C45 C 0.3457(5) 0.3690(4) 0.8952(4) 0.0261(16) Uani 1 1 d . . .
H45A H 0.3613 0.4027 0.9388 0.031 Uiso 1 1 calc R . .
C46 C 0.3733(5) 0.3805(4) 0.8137(4) 0.0245(16) Uani 1 1 d . . .
H46A H 0.4088 0.4213 0.8023 0.029 Uiso 1 1 calc R . .
C47 C 0.2688(5) 0.2966(4) 1.0054(4) 0.0334(19) Uani 1 1 d . . .
H47A H 0.2254 0.2566 1.0059 0.050 Uiso 1 1 calc R . .
H47B H 0.2378 0.3385 1.0264 0.050 Uiso 1 1 calc R . .
H47C H 0.3258 0.2864 1.0426 0.050 Uiso 1 1 calc R . .
C51 C 0.1307(4) 0.4434(3) 0.3551(4) 0.0211(15) Uani 1 1 d . . .
C52 C 0.0597(5) 0.3925(4) 0.3550(4) 0.0262(16) Uani 1 1 d . . .
H52A H 0.0741 0.3473 0.3781 0.031 Uiso 1 1 calc R . .
C53 C -0.0317(5) 0.4073(4) 0.3216(4) 0.0280(17) Uani 1 1 d . . .
H53A H -0.0789 0.3719 0.3213 0.034 Uiso 1 1 calc R . .
C54 C -0.0545(5) 0.4736(4) 0.2886(4) 0.0270(17) Uani 1 1 d . . .
C55 C 0.0152(5) 0.5243(4) 0.2907(4) 0.0262(16) Uani 1 1 d . . .
H55A H 0.0004 0.5701 0.2697 0.031 Uiso 1 1 calc R . .
C56 C 0.1055(5) 0.5092(4) 0.3227(4) 0.0285(17) Uani 1 1 d . . .
H56A H 0.1522 0.5449 0.3228 0.034 Uiso 1 1 calc R . .
C57 C -0.1527(5) 0.4877(4) 0.2494(5) 0.0338(18) Uani 1 1 d . . .
H57A H -0.1983 0.4800 0.2924 0.051 Uiso 1 1 calc R . .
H57B H -0.1667 0.4559 0.2009 0.051 Uiso 1 1 calc R . .
H57C H -0.1569 0.5364 0.2293 0.051 Uiso 1 1 calc R . .
O1 O 0.4474(4) 0.4934(2) 0.5782(3) 0.0328(13) Uani 1 1 d . . .
O2 O 0.6016(3) 0.4793(2) 0.5097(3) 0.0314(12) Uani 1 1 d . . .
Cl1 Cl -0.07700(18) 0.07129(12) 0.43964(15) 0.0632(6) Uani 1 1 d . . .
Cl2 Cl -0.12998(15) 0.17340(12) 0.30759(12) 0.0493(6) Uani 1 1 d . . .
Cl3 Cl 0.05568(17) 0.17640(14) 0.39368(17) 0.0690(7) Uani 1 1 d . . .
C60 C -0.0643(6) 0.1578(4) 0.4057(5) 0.042(2) Uani 1 1 d . . .
H60A H -0.0875 0.1900 0.4501 0.051 Uiso 1 1 calc R . .
 
loop_
 _atom_site_aniso_label
 _atom_site_aniso_U_11
 _atom_site_aniso_U_22
 _atom_site_aniso_U_33
 _atom_site_aniso_U_23
 _atom_site_aniso_U_13
 _atom_site_aniso_U_12
Hf 0.01361(14) 0.01668(13) 0.01496(12) 0.00057(14) 0.00141(9) -0.00025(15)
N1 0.014(3) 0.015(3) 0.022(3) 0.004(2) 0.000(2) -0.005(2)
N2 0.016(3) 0.023(3) 0.011(3) -0.004(2) 0.001(2) -0.001(2)
N3 0.018(3) 0.020(3) 0.017(3) 0.007(2) 0.004(2) 0.003(2)
N4 0.013(3) 0.019(3) 0.016(3) -0.003(2) -0.001(2) -0.003(2)
C1 0.019(4) 0.018(3) 0.025(3) 0.004(3) -0.002(3) -0.004(3)
C2 0.020(4) 0.033(4) 0.027(4) 0.002(3) -0.002(3) 0.005(3)
C3 0.027(4) 0.031(4) 0.014(3) 0.003(3) 0.001(3) 0.001(4)
C4 0.023(4) 0.020(4) 0.018(3) 0.003(3) 0.000(3) -0.002(3)
C5 0.019(4) 0.014(3) 0.022(3) -0.004(3) -0.002(3) -0.001(3)
C6 0.023(4) 0.010(3) 0.020(3) -0.001(3) 0.003(3) 0.000(3)
C7 0.025(4) 0.016(3) 0.020(3) -0.001(3) 0.003(3) 0.006(3)
C8 0.024(4) 0.021(4) 0.023(4) -0.002(3) 0.005(3) -0.003(3)
C9 0.020(4) 0.019(3) 0.018(3) 0.001(3) 0.002(3) 0.002(3)
C10 0.013(4) 0.016(3) 0.024(4) 0.004(3) 0.000(3) 0.002(3)
C11 0.017(4) 0.019(3) 0.017(3) -0.002(3) -0.001(3) -0.002(3)
C12 0.017(4) 0.021(4) 0.024(4) -0.001(3) 0.003(3) 0.003(3)
C13 0.021(4) 0.028(4) 0.020(3) 0.007(3) 0.001(3) -0.004(3)
C14 0.016(4) 0.012(3) 0.018(3) 0.004(3) 0.000(3) 0.000(3)
C15 0.018(4) 0.012(3) 0.023(3) 0.003(3) 0.001(3) 0.001(3)
C16 0.012(4) 0.016(3) 0.030(4) -0.001(3) 0.009(3) -0.005(3)
C17 0.024(4) 0.023(4) 0.019(3) 0.000(3) 0.005(3) -0.002(3)
C18 0.016(4) 0.028(4) 0.029(4) 0.002(3) -0.001(3) 0.000(3)
C19 0.010(3) 0.022(4) 0.029(4) 0.003(3) 0.005(3) -0.004(3)
C20 0.016(3) 0.019(3) 0.020(3) 0.002(3) 0.002(3) -0.002(3)
C21 0.022(4) 0.027(4) 0.011(3) 0.003(3) 0.000(3) 0.009(3)
C22 0.023(4) 0.026(4) 0.021(3) -0.003(3) 0.002(3) 0.002(3)
C23 0.025(4) 0.027(4) 0.021(3) -0.006(3) -0.004(3) 0.008(3)
C24 0.027(4) 0.030(4) 0.016(3) 0.000(3) 0.001(3) 0.006(3)
C25 0.018(4) 0.030(4) 0.026(4) 0.007(3) 0.003(3) -0.003(3)
C26 0.022(4) 0.022(4) 0.026(4) -0.005(3) -0.001(3) 0.003(3)
C27 0.037(5) 0.044(4) 0.021(4) 0.001(3) 0.003(3) 0.002(4)
C31 0.015(4) 0.021(3) 0.017(3) -0.002(3) -0.001(3) 0.002(3)
C32 0.023(4) 0.024(4) 0.015(3) 0.007(3) 0.004(3) 0.001(3)
C34 0.020(4) 0.040(4) 0.020(4) 0.004(3) 0.006(3) 0.004(4)
C35 0.008(4) 0.048(5) 0.035(4) 0.006(4) -0.001(3) -0.009(4)
C33 0.028(4) 0.025(4) 0.018(3) 0.005(3) 0.003(3) 0.004(3)
C36 0.019(4) 0.025(4) 0.028(4) 0.001(3) -0.001(3) -0.004(3)
C37 0.026(5) 0.060(6) 0.034(4) 0.015(4) 0.007(4) 0.002(4)
C41 0.013(4) 0.023(4) 0.018(3) 0.006(3) 0.007(3) 0.003(3)
C42 0.032(4) 0.024(4) 0.026(4) -0.002(3) 0.011(3) 0.002(3)
C43 0.027(4) 0.032(4) 0.034(4) 0.010(4) 0.006(3) -0.002(4)
C44 0.021(4) 0.026(4) 0.021(3) 0.003(3) 0.002(3) 0.002(3)
C45 0.025(4) 0.030(4) 0.022(4) -0.006(3) -0.002(3) -0.003(3)
C46 0.024(4) 0.027(4) 0.022(4) -0.005(3) 0.005(3) 0.005(3)
C47 0.032(5) 0.041(4) 0.028(4) 0.007(4) 0.009(4) 0.002(4)
C51 0.013(4) 0.031(4) 0.020(3) -0.002(3) 0.003(3) 0.000(3)
C52 0.023(4) 0.025(4) 0.030(4) 0.001(3) -0.004(3) -0.001(3)
C53 0.013(4) 0.037(5) 0.034(4) -0.010(3) 0.000(3) -0.001(3)
C54 0.018(4) 0.033(4) 0.029(4) -0.011(3) -0.004(3) 0.012(3)
C55 0.020(4) 0.025(4) 0.033(4) -0.006(3) -0.002(3) 0.004(3)
C56 0.022(4) 0.026(4) 0.037(4) 0.002(3) -0.001(3) -0.009(3)
C57 0.018(4) 0.036(4) 0.046(5) -0.013(4) -0.011(3) 0.003(4)
O1 0.053(4) 0.022(3) 0.025(3) -0.004(2) 0.015(2) -0.003(2)
O2 0.020(3) 0.028(3) 0.045(3) -0.001(2) -0.004(2) 0.003(2)
Cl1 0.0727(17) 0.0558(14) 0.0618(14) 0.0155(13) 0.0104(13) 0.0029(14)
Cl2 0.0476(14) 0.0635(14) 0.0364(11) -0.0014(10) 0.0005(10) 0.0188(11)
Cl3 0.0477(16) 0.0775(17) 0.0801(18) -0.0060(15) -0.0049(13) -0.0164(13)
C60 0.043(5) 0.047(5) 0.038(5) 0.002(4) 0.011(4) -0.002(4)
 
_geom_special_details
;
 All esds (except the esd in the dihedral angle between two l.s. planes)
 are estimated using the full covariance matrix.  The cell esds are taken
 into account individually in the estimation of esds in distances, angles
 and torsion angles; correlations between esds in cell parameters are only
 used when they are defined by crystal symmetry.  An approximate (isotropic)
 treatment of cell esds is used for estimating esds involving l.s. planes.
;
 
loop_
 _geom_bond_atom_site_label_1
 _geom_bond_atom_site_label_2
 _geom_bond_distance
 _geom_bond_site_symmetry_2
 _geom_bond_publ_flag
Hf O1 2.147(4) 3_666 ?
Hf O2 2.154(5) . ?
Hf O1 2.160(4) . ?
Hf O2 2.162(4) 3_666 ?
Hf N3 2.219(5) . ?
Hf N1 2.233(5) . ?
Hf N2 2.252(5) . ?
Hf N4 2.257(5) . ?
Hf Hf 3.1182(8) 3_666 ?
N1 C4 1.390(7) . ?
N1 C1 1.397(8) . ?
N2 C6 1.389(7) . ?
N2 C9 1.392(8) . ?
N3 C11 1.392(8) . ?
N3 C14 1.394(7) . ?
N4 C19 1.371(8) . ?
N4 C16 1.397(7) . ?
C1 C20 1.406(8) . ?
C1 C2 1.431(9) . ?
C2 C3 1.345(9) . ?
C3 C4 1.435(9) . ?
C4 C5 1.398(9) . ?
C5 C6 1.390(9) . ?
C5 C21 1.493(8) . ?
C6 C7 1.432(9) . ?
C7 C8 1.348(9) . ?
C8 C9 1.432(8) . ?
C9 C10 1.399(8) . ?
C10 C11 1.388(8) . ?
C10 C31 1.487(8) . ?
C11 C12 1.436(8) . ?
C12 C13 1.336(8) . ?
C13 C14 1.418(9) . ?
C14 C15 1.387(8) . ?
C15 C16 1.382(9) . ?
C15 C41 1.503(8) . ?
C16 C17 1.432(9) . ?
C17 C18 1.342(9) . ?
C18 C19 1.442(8) . ?
C19 C20 1.406(8) . ?
C20 C51 1.488(9) . ?
C21 C22 1.390(9) . ?
C21 C26 1.401(9) . ?
C22 C23 1.397(8) . ?
C23 C24 1.387(9) . ?
C24 C25 1.389(9) . ?
C24 C27 1.504(8) . ?
C25 C26 1.389(8) . ?
C31 C32 1.395(8) . ?
C31 C36 1.402(9) . ?
C32 C33 1.390(9) . ?
C34 C33 1.380(9) . ?
C34 C35 1.385(9) . ?
C34 C37 1.500(9) . ?
C35 C36 1.402(9) . ?
C41 C42 1.373(9) . ?
C41 C46 1.407(9) . ?
C42 C43 1.380(9) . ?
C43 C44 1.390(9) . ?
C44 C45 1.390(9) . ?
C44 C47 1.510(8) . ?
C45 C46 1.379(8) . ?
C51 C56 1.389(9) . ?
C51 C52 1.397(9) . ?
C52 C53 1.391(9) . ?
C53 C54 1.393(9) . ?
C54 C55 1.381(9) . ?
C54 C57 1.503(9) . ?
C55 C56 1.371(9) . ?
O1 O2 1.582(6) 3_666 ?
O1 Hf 2.147(4) 3_666 ?
O2 O1 1.582(6) 3_666 ?
O2 Hf 2.161(4) 3_666 ?
Cl1 C60 1.744(8) . ?
Cl2 C60 1.761(8) . ?
Cl3 C60 1.763(8) . ?
 
loop_
 _geom_angle_atom_site_label_1
 _geom_angle_atom_site_label_2
 _geom_angle_atom_site_label_3
 _geom_angle
 _geom_angle_site_symmetry_1
 _geom_angle_site_symmetry_3
 _geom_angle_publ_flag
O1 Hf O2 43.15(17) 3_666 . ?
O1 Hf O1 87.21(16) 3_666 . ?
O2 Hf O1 71.55(18) . . ?
O1 Hf O2 71.65(17) 3_666 3_666 ?
O2 Hf O2 87.46(17) . 3_666 ?
O1 Hf O2 42.94(17) . 3_666 ?
O1 Hf N3 128.07(19) 3_666 . ?
O2 Hf N3 86.38(18) . . ?
O1 Hf N3 86.50(18) . . ?
O2 Hf N3 127.91(18) 3_666 . ?
O1 Hf N1 88.90(18) 3_666 . ?
O2 Hf N1 130.12(17) . . ?
O1 Hf N1 129.83(19) . . ?
O2 Hf N1 88.78(18) 3_666 . ?
N3 Hf N1 132.04(18) . . ?
O1 Hf N2 79.71(18) 3_666 . ?
O2 Hf N2 78.89(18) . . ?
O1 Hf N2 147.75(19) . . ?
O2 Hf N2 149.28(18) 3_666 . ?
N3 Hf N2 78.93(18) . . ?
N1 Hf N2 79.62(18) . . ?
O1 Hf N4 147.78(18) 3_666 . ?
O2 Hf N4 147.75(18) . . ?
O1 Hf N4 78.47(18) . . ?
O2 Hf N4 78.33(17) 3_666 . ?
N3 Hf N4 80.10(18) . . ?
N1 Hf N4 78.86(17) . . ?
N2 Hf N4 126.06(18) . . ?
O1 Hf Hf 43.77(11) 3_666 3_666 ?
O2 Hf Hf 43.83(12) . 3_666 ?
O1 Hf Hf 43.44(12) . 3_666 ?
O2 Hf Hf 43.64(12) 3_666 3_666 ?
N3 Hf Hf 112.47(13) . 3_666 ?
N1 Hf Hf 115.49(12) . 3_666 ?
N2 Hf Hf 117.57(13) . 3_666 ?
N4 Hf Hf 116.36(12) . 3_666 ?
C4 N1 C1 105.7(5) . . ?
C4 N1 Hf 126.0(4) . . ?
C1 N1 Hf 125.3(4) . . ?
C6 N2 C9 105.6(5) . . ?
C6 N2 Hf 125.5(4) . . ?
C9 N2 Hf 124.7(4) . . ?
C11 N3 C14 105.7(5) . . ?
C11 N3 Hf 123.8(4) . . ?
C14 N3 Hf 124.3(4) . . ?
C19 N4 C16 106.4(5) . . ?
C19 N4 Hf 123.7(4) . . ?
C16 N4 Hf 122.8(4) . . ?
N1 C1 C20 125.1(5) . . ?
N1 C1 C2 109.4(5) . . ?
C20 C1 C2 125.2(6) . . ?
C3 C2 C1 107.6(6) . . ?
C2 C3 C4 108.0(5) . . ?
N1 C4 C5 125.9(6) . . ?
N1 C4 C3 109.2(5) . . ?
C5 C4 C3 124.9(6) . . ?
C6 C5 C4 124.4(6) . . ?
C6 C5 C21 117.8(5) . . ?
C4 C5 C21 117.7(5) . . ?
N2 C6 C5 126.4(6) . . ?
N2 C6 C7 109.6(5) . . ?
C5 C6 C7 124.0(6) . . ?
C8 C7 C6 107.7(6) . . ?
C7 C8 C9 107.6(6) . . ?
N2 C9 C10 125.4(6) . . ?
N2 C9 C8 109.5(5) . . ?
C10 C9 C8 125.0(6) . . ?
C11 C10 C9 124.6(6) . . ?
C11 C10 C31 117.8(5) . . ?
C9 C10 C31 117.4(5) . . ?
C10 C11 N3 125.1(6) . . ?
C10 C11 C12 126.0(6) . . ?
N3 C11 C12 108.8(5) . . ?
C13 C12 C11 107.9(6) . . ?
C12 C13 C14 108.1(6) . . ?
C15 C14 N3 124.1(6) . . ?
C15 C14 C13 126.4(6) . . ?
N3 C14 C13 109.4(5) . . ?
C16 C15 C14 126.9(6) . . ?
C16 C15 C41 116.8(5) . . ?
C14 C15 C41 116.3(5) . . ?
C15 C16 N4 125.7(5) . . ?
C15 C16 C17 125.9(6) . . ?
N4 C16 C17 108.4(5) . . ?
C18 C17 C16 108.6(6) . . ?
C17 C18 C19 106.8(6) . . ?
N4 C19 C20 126.4(5) . . ?
N4 C19 C18 109.9(5) . . ?
C20 C19 C18 123.7(6) . . ?
C1 C20 C19 123.8(6) . . ?
C1 C20 C51 117.3(5) . . ?
C19 C20 C51 118.8(5) . . ?
C22 C21 C26 118.1(6) . . ?
C22 C21 C5 121.2(6) . . ?
C26 C21 C5 120.6(6) . . ?
C21 C22 C23 120.5(6) . . ?
C24 C23 C22 121.5(6) . . ?
C23 C24 C25 117.8(6) . . ?
C23 C24 C27 120.7(6) . . ?
C25 C24 C27 121.5(6) . . ?
C24 C25 C26 121.3(6) . . ?
C25 C26 C21 120.7(6) . . ?
C32 C31 C36 116.8(6) . . ?
C32 C31 C10 121.7(6) . . ?
C36 C31 C10 121.5(6) . . ?
C33 C32 C31 122.0(6) . . ?
C33 C34 C35 118.5(6) . . ?
C33 C34 C37 121.4(6) . . ?
C35 C34 C37 120.0(6) . . ?
C34 C35 C36 120.9(6) . . ?
C34 C33 C32 120.8(6) . . ?
C35 C36 C31 121.0(6) . . ?
C42 C41 C46 117.7(6) . . ?
C42 C41 C15 122.2(6) . . ?
C46 C41 C15 120.0(6) . . ?
C41 C42 C43 120.9(6) . . ?
C42 C43 C44 122.1(6) . . ?
C45 C44 C43 116.9(6) . . ?
C45 C44 C47 120.6(6) . . ?
C43 C44 C47 122.5(6) . . ?
C46 C45 C44 121.4(6) . . ?
C45 C46 C41 120.9(6) . . ?
C56 C51 C52 117.4(6) . . ?
C56 C51 C20 122.5(6) . . ?
C52 C51 C20 120.1(6) . . ?
C53 C52 C51 120.8(6) . . ?
C52 C53 C54 120.5(6) . . ?
C55 C54 C53 118.5(6) . . ?
C55 C54 C57 121.7(6) . . ?
C53 C54 C57 119.8(6) . . ?
C56 C55 C54 120.8(7) . . ?
C55 C56 C51 122.0(7) . . ?
O2 O1 Hf 68.7(2) 3_666 3_666 ?
O2 O1 Hf 68.6(2) 3_666 . ?
Hf O1 Hf 92.78(16) 3_666 . ?
O1 O2 Hf 68.2(2) 3_666 . ?
O1 O2 Hf 68.5(2) 3_666 3_666 ?
Hf O2 Hf 92.53(17) . 3_666 ?
Cl1 C60 Cl2 111.4(4) . . ?
Cl1 C60 Cl3 110.2(4) . . ?
Cl2 C60 Cl3 109.0(4) . . ?
 
_diffrn_measured_fraction_theta_max    0.995
_diffrn_reflns_theta_full              27.48
_diffrn_measured_fraction_theta_full   0.995
_refine_diff_density_max    1.100
_refine_diff_density_min   -0.833
_refine_diff_density_rms    0.193
